# Supplementary material for: Designing a Model for Earthquake Timing and Magnitude Prediction based on Neural Networks and Particle Swarm Optimization (PSO) Algorithm
Source: Research Square preprint supplement (doi:10.21203/rs.3.rs-7979190/v1), 2025-11-11
Supplement: Supplementary file 1 [file 9355cb96246b8ba6f1de7582.docx]

**Table 1**. Summary of ANFIS Performance with PSO

| **Dataset** | **RMSE** | **Error Percentage (%)** |
| --- | --- | --- |
| Training Data | 0.0028 | 16.09 |
| Testing Data | 0.0026 | 16.74 |

**Table2.** Summary of Performance of Different Implementation Methods

| **Method** | **Training RMSE** | **Training Error (%)** | **Testing RMSE** | **Testing Error (%)** |
| --- | --- | --- | --- | --- |
| FCM + ANFIS | 0.00351 | 16.84 | 0.00349 | 17.32 |
| PSO + ANFIS | 0.00293 | 16.25 | 0.00288 | 16.94 |

**Table 3.** Statistical Summary of ANN-PSO Model Performance Across 20 Independent Runs

| Metric | Mean (%) | Standard Deviation (%) | Range (%) |
| --- | --- | --- | --- |
| Magnitude Accuracy | 94.1 | 0.82 | 92.5–95.3 |
| Timing Accuracy | 91.7 | 0.95 | 90.0–93.2 |
| Precision | 92.8 | 0.78 | 91.2–94.1 |
| Recall | 93.4 | 0.85 | 91.8–94.9 |
| MSE | 0.023 | 0.002 | 0.020–0.026 |

**Table 4.** Performance Comparison of ANN-PSO, Traditional ANN, and SVM

| Method | Magnitude  Accuracy (%) | Timing  Accuracy (%) | Precision (%) | Recall (%) | MSE | Training  Time (s) |
| --- | --- | --- | --- | --- | --- | --- |
| ANN-PSO | 94.1 | 91.7 | 92.8 | 93.4 | 0.023 | 152 |
| ANN | 87.8 | 85.5 | 86.5 | 87.2 | 0.038 | 205 |
| SVM | 85.2 | 83.0 | 84.3 | 85.1 | 0.045 | 178 |
